# Supplementary material
Source: PubMed Central journal article supplement (PMC3987666)
Supplement: NIHMS555222-supplement-Table_S1__Figure_S1.pdf [file NIHMS555222-supplement-Table_S1__Figure_S1.pdf]

Supplementary material for DeKelder RC, et al., RUNX1-ETO induces a type I interferon response which negatively effects t(8;21)-induced increased self-renewal and leukemia development, *Leukemia & Lymphoma*, 2013; doi: 10.3109/10428194.2013.815351.

Supplementary Table I. List of interferon-stimulated genes upregulated by RUNX1-ETO and RUNX1-ETO-W692A in murine lineage-negative, Sca-1<sup>+</sup> c-Kit<sup>+</sup> cells [14]. The raw data from which this values were extracted are contained in Supplementary Tables I & II of reference 14.

| Gene Symbol   | Fold Change in RUNX1-ETO | Fold Change in RUNX1-ETO-W692A | Ratio RE/RE9a |
|---------------|--------------------------|--------------------------------|---------------|
| <i>Ifi44</i>  | 18.64                    | 0.95                           | 19.57         |
| <i>Ifit1</i>  | 39.49                    | 1.29                           | 30.61         |
| <i>Oasl1</i>  | 8.57                     | 1.28                           | 6.70          |
| <i>Ifit2</i>  | 2.36                     | 0.76                           | 3.12          |
| <i>Cxcl10</i> | 8.22                     | 1.48                           | 5.55          |
| <i>Oasl2</i>  | 3.75                     | 0.88                           | 4.28          |
| <i>Irf7</i>   | 2.51                     | 0.91                           | 2.76          |
| <i>Ddx58</i>  | 4.24                     | 0.90                           | 4.71          |
| <i>Irf9</i>   | 2.98                     | 0.98                           | 3.04          |

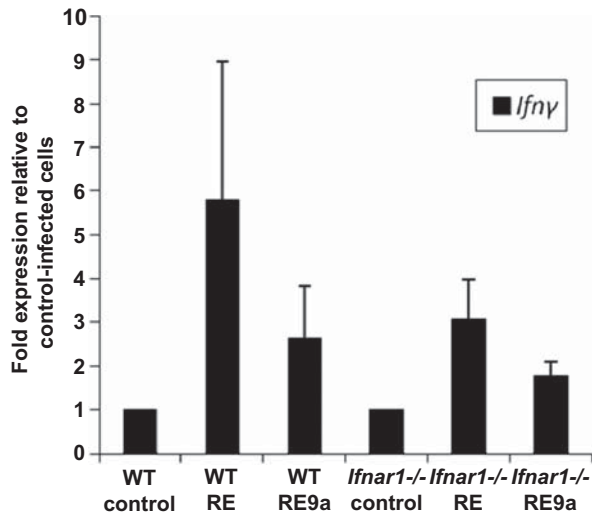

Supplementary Figure 1. Expression of RUNX1-ETO and RUNX1-ETO9a induces *IFN-g* expression in murine bone marrow cells Expression of *IFN-g* in retrovirally transduced wildtype or *Ifnar1*<sup>-/-</sup> murine bone marrow cells. Expression levels were normalized to *Gapdh* with control-transduced cells of each genotype set to 1. Data show averages and standard deviations of 3 independent experiments.
